# Supplementary material
Source: PubMed Central journal article supplement (PMC4169719)
Supplement: NIHMS615218-supplement-01.pdf [file NIHMS615218-supplement-01.pdf]

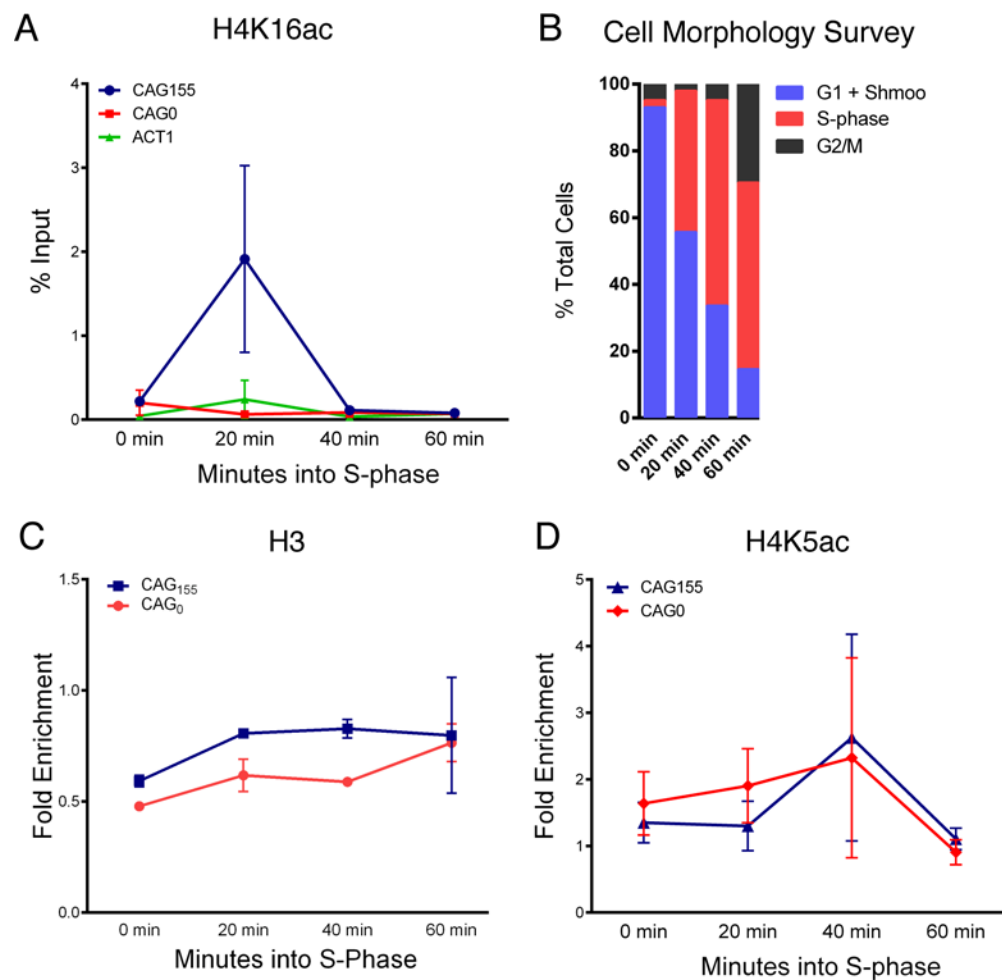

**Figure S1. ChIP to detect acetyl-lysine residues at a (CAG)<sub>155</sub> repeat tract.** Related to Figure 2. Cells were arrested in G1 with  $\alpha$ -factor and time points taken after release into fresh media. qPCR used primers 0.4 and 0.6 kb upstream of the CAG repeat. (A) H4K16ac % Input ( $2^{-\Delta Ct}$ ; no normalization) was measured at the CAG repeat (blue), a no-tract control (red), and at the ACT1 locus (green) as an internal control. (B) Cells used for ChIP were surveyed for cell cycle stage by morphology. Cells were arrested in G1 with  $\alpha$ -factor and time points taken after release into fresh media. Cells were analyzed after crosslinking with formaldehyde and visualized under a light microscope. The bars represent the average of three CAG<sub>155</sub> experiments. (C) Histone H3 levels were measured at the CAG repeat (blue) and a no-tract control (red); fold enrichment was calculated by normalization to an ACT1 control. (D) H4K5ac was measured at the CAG repeat (blue) and a no-tract control (red); fold enrichment was calculated by normalization to an ACT1 control. Data for A, C, D are represented as mean  $\pm$  SEM.

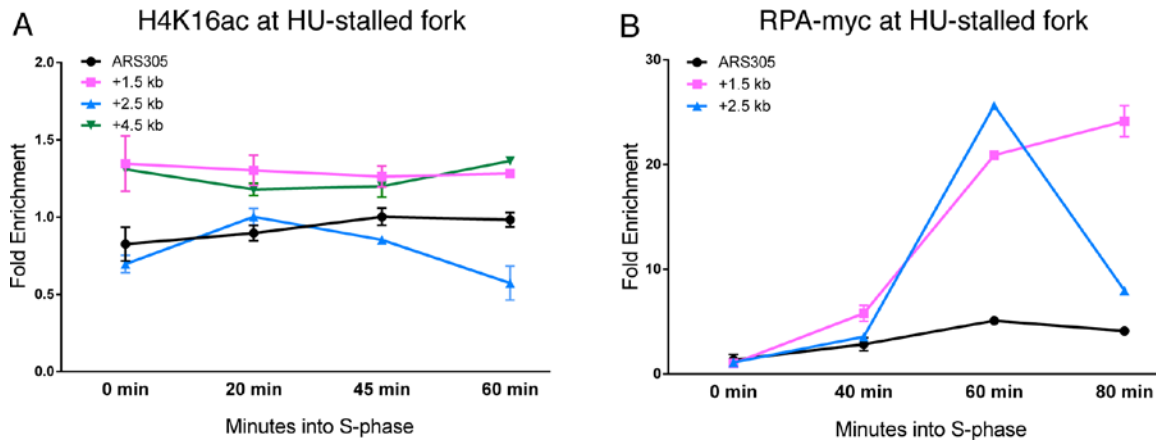

**Figure S2 H4K16 acetylation at a stalled replication fork.** Related to Figure 2. Cells were arrested in G1 with alpha factor and released into 0.2M HU and time points were taken as indicated. (A) H4K16ac ChIP was quantified by qPCR using primers at ARS305 and 1.5 kb, 2.5 kb, or 4.5 kb from the origin and fold enrichment over an ASI1 amplicon was used for normalization (Papamichos-Chronakis & Peterson, 2008). (B) A positive control shows enrichment for RPA 1.5 kb and 2.5 kb from the origin, indicating that the fork was efficiently stalled under these conditions. Fold enrichment over the ASI1 locus +/- SEM is shown.

**Table S1** (CAG)<sub>85</sub> Stability Assay Data

|                                               | Total reactions | Expansions |     |              |                        | Contractions |      |              |                        |
|-----------------------------------------------|-----------------|------------|-----|--------------|------------------------|--------------|------|--------------|------------------------|
|                                               |                 | #          | %   | Fold over wt | p-value to wt          | #            | %    | Fold over wt | p-value to wt          |
| <b>Wildtype strains</b>                       |                 |            |     |              |                        |              |      |              |                        |
| Wildtype CFY801                               | 299             | 4          | 1.3 | --           | --                     | 33           | 11.0 | --           | --                     |
| H3/H4-wildtype CFY2501                        | 156             | 3          | 1.9 | 1.4          | 1                      | 27           | 17.3 | 1.6          | 1                      |
| ESA1-KAN wildtype CFY2048 <sup>a</sup>        | 130             | 1          | 0.8 | 0.6          | 1                      | 14           | 10.8 | 1.0          | 1                      |
| <b>Single mutants</b>                         |                 |            |     |              |                        |              |      |              |                        |
| <i>esa1-1851<sup>b</sup></i>                  | 125             | 10         | 8.0 | 6.0          | 5.0 x 10 <sup>-3</sup> | 25           | 20.0 | 1.8          | 0.05                   |
| <i>esa1-L357H<sup>b</sup></i>                 | 104             | 2          | 1.9 | 1.4          | 0.65                   | 17           | 16.4 | 1.5          | 0.17                   |
| <i> yng2Δ</i>                                 | 102             | 8          | 7.8 | 5.9          | 2.7 x 10 <sup>-3</sup> | 14           | 13.7 | 1.2          | 0.48                   |
| <i> hat1Δ</i>                                 | 104             | 6          | 5.8 | 4.3          | 0.02                   | 19           | 18.3 | 1.7          | 0.06                   |
| <i> gcn5Δ</i>                                 | 113             | 3          | 2.7 | 2.0          | 0.40                   | 7            | 6.2  | 0.6          | 0.19                   |
| <i> sas3Δ<sup>c</sup></i>                     | 154             | 4          | 2.6 | 2.0          | 0.45                   | 23           | 14.9 | 1.4          | 0.23                   |
| <i> sas2Δ</i>                                 | 179             | 3          | 1.7 | 1.3          | 1                      | 17           | 9.5  | 0.9          | 0.65                   |
| <i> sir2Δ</i>                                 | 187             | 7          | 3.7 | 2.8          | 0.12                   | 12           | 6.4  | 0.6          | 0.11                   |
| <i> hst1Δ</i>                                 | 105             | 1          | 1.0 | 0.7          | 1                      | 10           | 9.5  | 0.9          | 0.65                   |
| <i> hos2Δ</i>                                 | 104             | 1          | 1.0 | 0.7          | 1                      | 7            | 6.7  | 0.6          | 0.06                   |
| <i> set3Δ</i>                                 | 103             | 1          | 1.0 | 0.7          | 1                      | 13           | 12.6 | 1.1          | 0.72                   |
| <i> sum1Δ</i>                                 | 104             | 0          | 0   | 0            | 0.58                   | 10           | 9.6  | 0.9          | 0.85                   |
| <i> rpd3Δ</i>                                 | 218             | 2          | 0.9 | 0.7          | 1                      | 12           | 5.5  | 0.5          | 0.03                   |
| <b>HAT and HDAC double and triple mutants</b> |                 |            |     |              |                        |              |      |              |                        |
| <i> esa1-1851 sas2Δ<sup>b</sup></i>           | 104             | 6          | 5.8 | 4.3          | 0.02                   | 21           | 20.2 | 1.8          | 0.03                   |
| <i> hst1Δhos2Δ</i>                            | 101             | 5          | 5.0 | 3.7          | 4.9 x 10 <sup>-2</sup> | 19           | 18.8 | 1.7          | 0.06                   |
| <i> hst1Δsir2Δ</i>                            | 104             | 3          | 2.9 | 2.2          | 0.38                   | 7            | 6.7  | 0.6          | 0.25                   |
| <i> hos2Δrpd3Δ</i>                            | 174             | 4          | 2.3 | 1.7          | 0.47                   | 13           | 7.5  | 0.7          | 0.26                   |
| <i> hos2Δsir2Δ</i>                            | 102             | 9          | 8.8 | 6.6          | 9.3 x 10 <sup>-4</sup> | 13           | 12.8 | 1.2          | 0.7                    |
| <i> hst1Δhos2Δsir2Δ</i>                       | 205             | 19         | 9.3 | 6.9          | 9.9 x 10 <sup>-4</sup> | 53           | 25.9 | 2.3          | 3.8 x 10 <sup>-4</sup> |
| <b>Hda1 and Sae2 mutants</b>                  |                 |            |     |              |                        |              |      |              |                        |
| <i> hda1Δ</i>                                 | 98              | 6          | 6.1 | 4.6          | 0.02                   | 13           | 13.3 | 1.2          | 0.6                    |
| <i> hda1Δhos2Δrpd3Δ</i>                       | 102             | 7          | 6.9 | 5.1          | 7.5 x 10 <sup>-3</sup> | 11           | 10.8 | 1.0          | 1                      |
| <i> sae2Δ</i>                                 | 156             | 9          | 5.8 | 4.3          | 0.01                   | 28           | 18.0 | 1.6          | 0.04                   |
| <i> hda1Δsae2Δ</i>                            | 155             | 10         | 6.5 | 4.8          | 6.9 x 10 <sup>-3</sup> | 37           | 23.9 | 2.2          | 5.4 x 10 <sup>-4</sup> |
| <b>Histone mutants</b>                        |                 |            |     |              |                        |              |      |              |                        |
| <i> H4-K12R<sup>d</sup></i>                   | 100             | 8          | 8.0 | 6.0          | 0.03                   | 26           | 26.0 | 2.4          | 0.11                   |
| <i> H4-K16R<sup>d</sup></i>                   | 102             | 8          | 7.8 | 5.9          | 0.03                   | 26           | 25.5 | 2.3          | 0.12                   |
| <i> H4-K16Q<sup>d</sup></i>                   | 204             | 11         | 5.4 | 4.0          | 0.11                   | 40           | 19.6 | 1.8          | 0.68                   |
| <i> H4-K5,8R<sup>d</sup></i>                  | 104             | 5          | 4.8 | 3.6          | 0.27                   | 17           | 16.3 | 1.5          | 0.86                   |
| <i> H4-K5,8,12R<sup>d</sup></i>               | 102             | 10         | 9.8 | 7.3          | 7.1 x 10 <sup>-3</sup> | 21           | 20.6 | 1.9          | 0.52                   |
| <i> H4-K5,8,12Q<sup>d,e</sup></i>             | 109             | 6          | 5.5 | 2.9          | 0.17                   | 27           | 24.8 | 1.4          | 0.16                   |
| <i> H4-K5,8,12,16R<sup>d</sup></i>            | 102             | 10         | 9.8 | 7.3          | 7.1 x 10 <sup>-3</sup> | 29           | 28.4 | 2.6          | 0.04                   |
| <i> H3/H4 WT rad5Δ<sup>d</sup></i>            | 96              | 6          | 6.3 | 4.7          | 0.09                   | 25           | 26.0 | 2.7          | 0.11                   |
| <i> H4-K12R rad5Δ<sup>d</sup></i>             | 153             | 2          | 1.3 | 1.0          | 1                      | 40           | 26.1 | 2.4          | 0.07                   |
| <i> H4-K16R rad5Δ<sup>d</sup></i>             | 151             | 3          | 2.0 | 1.5          | 1                      | 15           | 9.9  | 0.9          | 0.07                   |
| <i> H3-NΔ<sup>d</sup></i>                     | 104             | 3          | 2.9 | 2.2          | 0.79                   | 10           | 9.6  | 0.9          | 0.10                   |

|                            | Total reactions | Expansions |     |              |               | Contractions |      |              |                        |
|----------------------------|-----------------|------------|-----|--------------|---------------|--------------|------|--------------|------------------------|
|                            |                 | #          | %   | Fold over wt | p-value to wt | #            | %    | Fold over wt | p-value to wt          |
| <i>H2A-NΔ</i> <sup>f</sup> | 93              | 2          | 2.2 | 1.6          | 1             | 25           | 26.9 | 2.4          | 0.03                   |
| <i>htz1Δ</i>               | 103             | 2          | 1.9 | 1.5          | 0.65          | 24           | 23.3 | 2.1          | 3.1 x 10 <sup>-3</sup> |

### HATs and HDACs and repair mutants

|                                     |     |    |      |     |                        |    |      |     |                        |
|-------------------------------------|-----|----|------|-----|------------------------|----|------|-----|------------------------|
| <i>lif1Δ</i>                        | 96  | 4  | 4.2  | 3.1 | 0.10                   | 16 | 16.7 | 1.5 | 0.16                   |
| <i>lif1Δ esa1-1851</i>              | 102 | 9  | 8.8  | 6.6 | 9.3 x 10 <sup>-4</sup> | 20 | 19.6 | 1.8 | 0.04                   |
| <i>lif1Δhst1Δhos2Δsir2Δ</i>         | 104 | 11 | 10.6 | 7.9 | 1.2 x 10 <sup>-4</sup> | 15 | 14.4 | 1.3 | 0.38                   |
| <i>rad52Δ</i>                       | 199 | 4  | 2    | 1.5 | 1                      | 45 | 22.6 | 2.1 | 6.4 x 10 <sup>-4</sup> |
| <i>rad52Δ esa1-1851<sup>b</sup></i> | 92  | 1  | 1.1  | 0.8 | 1                      | 4  | 4.4  | 0.4 | 0.07                   |
| <i>rad52Δhat1Δ</i>                  | 92  | 0  | 0    | 0   | 0.58                   | 16 | 17.4 | 1.6 | 0.15                   |
| <i>rad52Δhst1Δhos2Δ</i>             | 156 | 3  | 1.9  | 1.4 | 0.7                    | 17 | 10.9 | 1.0 | 1                      |
| <i>rad52Δhst1Δhos2Δsir2Δ</i>        | 205 | 8  | 3.9  | 2.9 | 0.08                   | 21 | 10.2 | 0.9 | 0.88                   |
| <i>rad5Δ</i>                        | 170 | 7  | 4.1  | 3.1 | 0.11                   | 31 | 18.2 | 1.7 | 0.04                   |
| <i>rad5Δ esa1-1851</i>              | 204 | 4  | 2.0  | 1.5 | 0.72                   | 31 | 15.2 | 1.4 | 0.18                   |
| <i>rad5Δhst1Δhos2Δsir2Δ</i>         | 229 | 9  | 3.9  | 2.9 | 0.09                   | 39 | 17.0 | 1.5 | 0.05                   |
| <i>rad57Δ</i>                       | 146 | 7  | 4.8  | 3.6 | 0.05                   | 24 | 16.4 | 1.5 | 0.13                   |
| <i>rad57Δ esa1-1851</i>             | 167 | 7  | 4.2  | 3.1 | 0.06                   | 20 | 12.0 | 1.1 | 0.76                   |
| <i>rad57Δhst1Δhos2Δsir2Δ</i>        | 205 | 8  | 3.9  | 2.9 | 0.07                   | 30 | 14.6 | 1.3 | 0.27                   |

### Chromatin remodeling

|                             |     |    |      |     |                        |    |      |     |                        |
|-----------------------------|-----|----|------|-----|------------------------|----|------|-----|------------------------|
| <i>rsc1Δ</i>                | 100 | 6  | 6.0  | 4.5 | 0.02                   | 9  | 9.0  | 0.8 | 0.71                   |
| <i>rsc1Δ esa1-1851</i>      | 163 | 17 | 10.4 | 7.8 | 1.5 x 10 <sup>-5</sup> | 31 | 19.0 | 1.7 | 0.02                   |
| <i>rsc1Δrad5Δ</i>           | 148 | 4  | 2.7  | 2.0 | 0.45                   | 22 | 14.9 | 1.4 | 0.28                   |
| <i>rsc2Δ</i>                | 104 | 5  | 4.8  | 3.6 | 0.05                   | 22 | 21.2 | 1.9 | 0.01                   |
| <i>rsc2Δ esa1-1851</i>      | 179 | 15 | 8.4  | 6.3 | 3.2 x 10 <sup>-4</sup> | 24 | 13.4 | 1.2 | 0.47                   |
| <i>rsc2Δhst1Δhos2Δsir2Δ</i> | 199 | 11 | 5.5  | 4.1 | 0.01                   | 28 | 14.1 | 1.3 | 0.33                   |
| <i>rsc2Δrad5Δ</i>           | 151 | 4  | 2.6  | 2.0 | 0.45                   | 25 | 16.6 | 1.5 | 0.10                   |
| <i>bd1Δ</i>                 | 202 | 8  | 4.0  | 3.0 | 0.04                   | 53 | 26.2 | 2.4 | 1.9 x 10 <sup>-5</sup> |
| <i>bd1Δ esa1-1851</i>       | 103 | 7  | 6.8  | 5.1 | 7.9 x 10 <sup>-3</sup> | 12 | 11.6 | 1.1 | 0.86                   |
| <i>bd1Δhst1Δhos2Δsir2Δ</i>  | 99  | 7  | 7.1  | 5.3 | 6.6 x 10 <sup>-3</sup> | 14 | 14.1 | 1.3 | 0.47                   |
| <i>snf2Δ</i>                | 96  | 1  | 1.5  | 1.1 | 1                      | 10 | 10.4 | 0.9 | 1                      |
| <i>snf2Δ esa1-1851</i>      | 104 | 9  | 8.7  | 6.5 | 1.0 x 10 <sup>-4</sup> | 18 | 17.3 | 1.6 | 0.12                   |
| <i>snf2Δhst1Δhos2Δsir2Δ</i> | 103 | 10 | 9.7  | 7.3 | 3.2 x 10 <sup>-4</sup> | 18 | 17.5 | 1.6 | 0.12                   |
| <i>swr1Δ</i>                | 93  | 2  | 2.2  | 1.6 | 0.63                   | 15 | 16.3 | 1.5 | 0.21                   |

All instability values statistically analyzed by Fisher's exact test, \*p < 0.05, \*\*p < 0.01.

<sup>a</sup> Instability was measured in a wildtype strain in which the KANMX6 cassette was integrated 150 bp 5' to the ESA1 stop codon to evaluate if integration of KANMX6 induced instability. These results indicate that KANMX6 downstream of ESA1 does not increase repeat instability. Therefore, instability in the *esa1* mutant allele strains can be attributed to the mutant allele.

<sup>b</sup> Compared to ESA1-wildtype (CFY2048).

<sup>c</sup> Data provided by M Koch.

<sup>d</sup> Compared to H3/H4 wildtype plasmid system, endogenous H3 and H4 copies deleted (CFY2051).

<sup>e</sup> H4K5,8,12Q plasmid provided by L Pillus (Torres-Machorro & Pillus, 2014).

<sup>f</sup> Compared to H2A/H2B wildtype plasmid system, endogenous H2A and H2B copies deleted (unpublished).

**Table S2** (CAG)<sub>85</sub> Fragility Assay Data

| Strain                                       | Wildtype     | <i>esa1-1851</i> | <i>esa1-1851</i> CAG <sub>155</sub> | <i>hat1Δ</i> | <i>hst1Δhos2Δ</i> |
|----------------------------------------------|--------------|------------------|-------------------------------------|--------------|-------------------|
| Mean Rate (x 10 <sup>-6</sup> ) <sup>a</sup> | <b>17.11</b> | <b>15.55</b>     | <b>13.43</b>                        | <b>9.59*</b> | <b>7.27*</b>      |
| SEM                                          | 2.45         | 2.26             | 2.25                                | 1.23         | 2.08              |
| No. replicates                               | (13)         | (6)              | (4)                                 | (6)          | (6)               |
| Strain                                       | H3/H4 WT     | <i>H4-K12R</i>   | <i>H4-K16R</i>                      |              |                   |
| Mean Rate (x 10 <sup>-6</sup> ) <sup>a</sup> | <b>34.67</b> | <b>38.3</b>      | <b>22.4</b>                         |              |                   |
| SEM                                          | 4.47         | 2.57             | 1.97                                |              |                   |
| No. replicates                               | (3)          | (3)              | (3)                                 |              |                   |

\*p&lt;0.05 to wt, Student's t-test

<sup>a</sup>Mean rate of Leu<sup>+</sup>FOA<sup>R</sup> mutants (x 10<sup>-6</sup>)**Table S3** Sister Chromatid Recombination Assay Data

| Strain                                          | Wildtype    | <i>rad57Δ</i> | <i>rad5Δ</i> | <i>esa1-1851</i> | <i> yng2Δ</i> | <i>hst1Δhos2Δsir2Δ</i> | <i>rsc1Δ</i> | <i>rsc2Δ</i> | <i>bdf1Δ</i> |
|-------------------------------------------------|-------------|---------------|--------------|------------------|---------------|------------------------|--------------|--------------|--------------|
| Mean Rate <sup>a</sup><br>(x 10 <sup>-5</sup> ) | <b>7.48</b> | <b>0.10**</b> | <b>0.70*</b> | <b>1.66**</b>    | <b>1.62**</b> | <b>10.31</b>           | <b>3.37*</b> | <b>2.97*</b> | <b>1.74*</b> |
| SEM                                             | 1.06        | 0.02          | 0.16         | 0.21             | 0.53          | 1.60                   | 0.37         | 0.73         | 0.71         |
| No. replicates                                  | (5)         | (3)           | (3)          | (5)              | (3)           | (6)                    | (3)          | (3)          | (3)          |

| Strain                                          | Wildtype<br>HU | Wildtype<br>MMS | <i>esa1-1851</i><br>+ MMS | <i>rsc1Δ</i><br>+ MMS | <i>rsc2Δ</i><br>+ MMS | <i>rad5Δ</i><br>+ MMS | <i>bdf1Δ</i> +<br>MMS |
|-------------------------------------------------|----------------|-----------------|---------------------------|-----------------------|-----------------------|-----------------------|-----------------------|
| Mean Rate <sup>a</sup><br>(x 10 <sup>-5</sup> ) | <b>6.32</b>    | <b>15.59**</b>  | <b>0.27**</b>             | <b>13.77**</b>        | <b>3.47</b>           | <b>4.23</b>           | <b>5.83</b>           |
| SEM                                             | 1.72           | 1.40            | 0.05                      | 1.85                  | 0.21                  | 0.50                  | 1.15                  |
| No. replicates                                  | (3)            | (3)             | (3)                       | (3)                   | (3)                   | (3)                   | (3)                   |

| Strain                                          | H3/H4 WT     | H4-K12R     | H4K16R       |
|-------------------------------------------------|--------------|-------------|--------------|
| Mean Rate <sup>b</sup><br>(x 10 <sup>-5</sup> ) | <b>11.47</b> | <b>3.89</b> | <b>2.24*</b> |
| SEM                                             | 0.10         | 2.38        | 0.57         |
| No. replicates                                  | (4)          | (3)         | (3)          |

\*p&lt;0.05 to wt, \*\*p&lt;0.01 to wt, Student's t-test

<sup>a</sup>SCR Mean rate of Trp<sup>+</sup>Ade<sup>+</sup> recombinants (x 10<sup>-5</sup>)<sup>b</sup>SCR Mean rate of Ura<sup>+</sup>Ade<sup>+</sup> recombinants (x 10<sup>-5</sup>)

## Supplemental Experimental Procedures

**Yeast strains and plasmids.** Plasmids containing H4K12R, H4K16R, and H4K16Q were made by cloning a SpeI/SalI fragment from pQQ18H4K12R, pQQ18H4K16R, and pQQ18H4K16Q plasmids (Blackwell et al., 2007) into pRS314 digested by SpeI/SalI. Plasmids were introduced into *HHT2ΔHHF2Δ* BY4705, CAG85 cells under Trp selection and correct point mutations were confirmed by sequencing. *HHT1* and *HHF2* were then deleted. The H4K5,8R, H4K5,8,12R, H4K5,8,12,16R (Dion et al, 2005), and H3-NΔ (Mann and Grunstein, 1992) *MET15*-marked plasmids were obtained from OJ Rando, JS Thompson, and M Grunstein. Yeast mutants were obtained by plasmid shuffle into CFY2051, using FAA counter selection to select for loss of the *TRP1*-marked plasmid containing wild-type copies of the H3/H4 genes. Trp<sup>-</sup> cells were verified to be Met<sup>+</sup> indicating gain of the point mutant plasmid. The H4K5,8,12Q plasmid contains a *TRP1* marker (Torres-Machorro and Pillus, 2014); this strain was obtained by plasmid shuffle with the H3K5,8,12R mutant strain (plasmid contains *MET15*), selecting for Trp<sup>+</sup> and verifying Met<sup>-</sup>. The H2A-NΔ plasmid, pJH161 (H2A-Δ5-21; marked with *HIS3*), was obtained from the Winston lab (Hirschhorn et al., 1995) and shuffled into the FY406 strain which has both wild-type copies of H2A and H2B deleted, then selecting for loss of the *URA3*-marked plasmid containing the wild-type H2A/H2B genes. YAC CF1, (CAG)<sub>85</sub> was then introduced by a kar cross and CAG repeat tract length was confirmed by PCR.

## Supplemental References

- Brachmann, C. B., Davies, A., Cost, G. J., Caputo, E., Li, J., Hieter, P., & Boeke, J. D. (1998). Designer deletion strains derived from *Saccharomyces cerevisiae* S288C: A useful set of strains and plasmids for PCR-mediated gene disruption and other applications. *Yeast*, *14*(2), 115-132.
- Blackwell, J. S., Jr, Wilkinson, S. T., Mosammaparast, N., & Pemberton, L. F. (2007). Mutational analysis of H3 and H4 N termini reveals distinct roles in nuclear import. *J. Biol. Chem.*, *282*(28), 20142-20150.
- Dion, M. F., Altschuler, S. J., Wu, L. F., & Rando, O. J. (2005). Genomic characterization reveals a simple histone H4 acetylation code. *Proc. Nat. Acad. Sci. U.S.A.*, *102*(15), 5501-5506.
- Fung, C. W., Mozlin, A. M., Symington, L. S. (2009). Suppression of the double-strand-break-repair defect of the *Saccharomyces cerevisiae rad57* mutant. *Genetics*, *181*(4), 1195-206.
- Hirschhorn, J. N., Bortvin, A. L., Ricupero-Hovasse, S. L., & Winston, F. (1995). A new class of histone H2A mutations in *Saccharomyces cerevisiae* causes specific transcriptional defects *in vivo*. *Mol. Cell. Biol.*, *15*(4), 1999-2009.
- Mann, R. K., & Grunstein, M. (1992). Histone H3 N-terminal mutations allow hyperactivation of the yeast GAL1 gene *in vivo*. *EMBO J.*, *11*(9), 3297-3306.

- Papamichos-Chronakis, M., & Peterson, C. L. (2008). The Ino80 chromatin-remodeling enzyme regulates replisome function and stability. *Nat. Struct. Mol. Biol.*, 15(4), 338-345.
- Torres-Machorro, A. L., & Pillus, L. (2014). Bypassing the requirement for an essential MYST acetyltransferase. *Genetics*, doi:genetics.114.165894 [pii]
- Yang, J. H., & Freudenreich, C. H. (2010). The Rtt109 histone acetyltransferase facilitates error-free replication to prevent CAG/CTG repeat contractions. *DNA Repair*, 9(4), 414-420.
